# Supplementary material for: Low-Level Environmental Cadmium Exposure Is Associated with DNA Hypomethylation in Argentinean Women
Source: PubMed Central journal article supplement (PMC3385444; doi:10.1289/ehp.1104600), 2012-03-01
Supplement: ehp.1104600.s001.pdf [file ehp.1104600.s001.pdf]

## Supplemental Material

### **Low-Level Environmental Cadmium Exposure is Associated with DNA Hypomethylation in Argentinean Women**

Mohammad Bakhtiar Hossain<sup>1,2</sup>, Marie Vahter<sup>3</sup>, Gabriela Concha<sup>4</sup>, Karin Broberg<sup>1\*</sup>

<sup>1</sup>Department of Laboratory Medicine, Division of Occupational and Environmental Medicine, Lund University, Lund, SE-22185 Sweden

<sup>2</sup>International Centre for Diarrhoeal Disease Research, Bangladesh (ICDDR,B), Dhaka, Bangladesh

<sup>3</sup>Institute of Environmental Medicine, Karolinska Institutet, Stockholm, Sweden

<sup>4</sup>National Food Agency, Risk and Benefit Assessment Department, 751 26 Uppsala, Sweden.

\* Correspondence: Karin Broberg, Department of Laboratory Medicine, Division of Occupational and Environmental Medicine, Lund University. Klinikgatan 21, SE-22185 Lund, Sweden.

Telephone: +46 (0) 46 173819. Fax: +46 (0) 46 143207. E-mail:

[karin.broberg\\_palmgren@med.lu.se](mailto:karin.broberg_palmgren@med.lu.se).

## Table of Contents

|                                                                                                                                                              |   |
|--------------------------------------------------------------------------------------------------------------------------------------------------------------|---|
| Supplemental Material, Table 1. Descriptive information and biomarker concentrations in blood and urine of women (N=90) analyzed for gene expression         | 3 |
| Supplemental Material, Figure 1. Mean fraction of methylated <i>LINE1</i> in peripheral lymphocytes according to quintiles of cadmium concentration in urine | 5 |
| Supplemental Material, Figure 2. Mean fraction of methylated <i>p16</i> in peripheral lymphocytes according to quintiles of cadmium concentration in urine   | 6 |
| Supplemental Material, Figure 3. Mean fraction of methylated <i>MLH1</i> in peripheral lymphocytes according to quintiles of cadmium concentration in urine  | 7 |

Supplemental Material, Table 1. Descriptive information and biomarker concentrations in blood and urine of women (N=90) analyzed for gene expression<sup>a</sup>

| Variables                                 | Median | 5 - 95 percentiles |
|-------------------------------------------|--------|--------------------|
| Age (years)                               | 32.0   | 15.0 – 60.5        |
| Body weight (Kg)                          | 55.5   | 41.3 – 77.5        |
| Height (cm)                               | 153    | 145 - 163          |
| BMI (kg/m <sup>2</sup> )                  | 24.0   | 18.0 – 33.1        |
| Blood hemoglobin (g/L)                    | 153    | 118 - 181          |
| Urinary creatinine (g/L) <sup>b</sup>     | 0.90   | 0.56-1.3           |
| Coca chewing (%)                          | 43.3   |                    |
| <i>LINE1</i> methylation (%) <sup>c</sup> | 85.7   | 83.6 - 89.1        |
| <i>p16</i> methylation (%) <sup>d</sup>   | 3.2    | 1.7 - 5.8          |
| <i>MLH1</i> methylation (%) <sup>e</sup>  | 3.6    | 1.1 - 7.1          |
| Blood cadmium (µg/L)                      | 0.32   | 0.19 - 0.64        |
| Urinary cadmium (µg/L) <sup>b</sup>       | 0.20   | 0.092 - 0.61       |
| Urinary arsenic (µg/L) <sup>b</sup>       | 204    | 15.6 - 622         |
| Blood selenium (µg/L)                     | 178    | 154 - 220          |
| Blood zinc (mg/L)                         | 6.8    | 5.3 - 8.2          |
| Urinary boron (mg/L) <sup>b</sup>         | 13.1   | 2.0 – 25.8         |
| Urinary cesium (µg/L) <sup>b</sup>        | 412    | 14.0 – 1152        |
| Urinary lithium (mg/L) <sup>b</sup>       | 3.2    | 0.17 – 10.4        |

<sup>a</sup>Information available from N=90 subjects, except for urinary creatinine (N=86).

<sup>b</sup>Adjusted for specific gravity of urine (1.020 g/ml).

<sup>c</sup>Average of relative amounts of methylated Cs in 4 CpGs +305-331, GenBank accession X58075.

<sup>d</sup>Average of relative amounts of methylated Cs in 7 CpGs +148-174, acc. L27211.

<sup>e</sup>Average of relative amounts of methylated Cs in 4 CpGs -209- -188, acc. U07418.

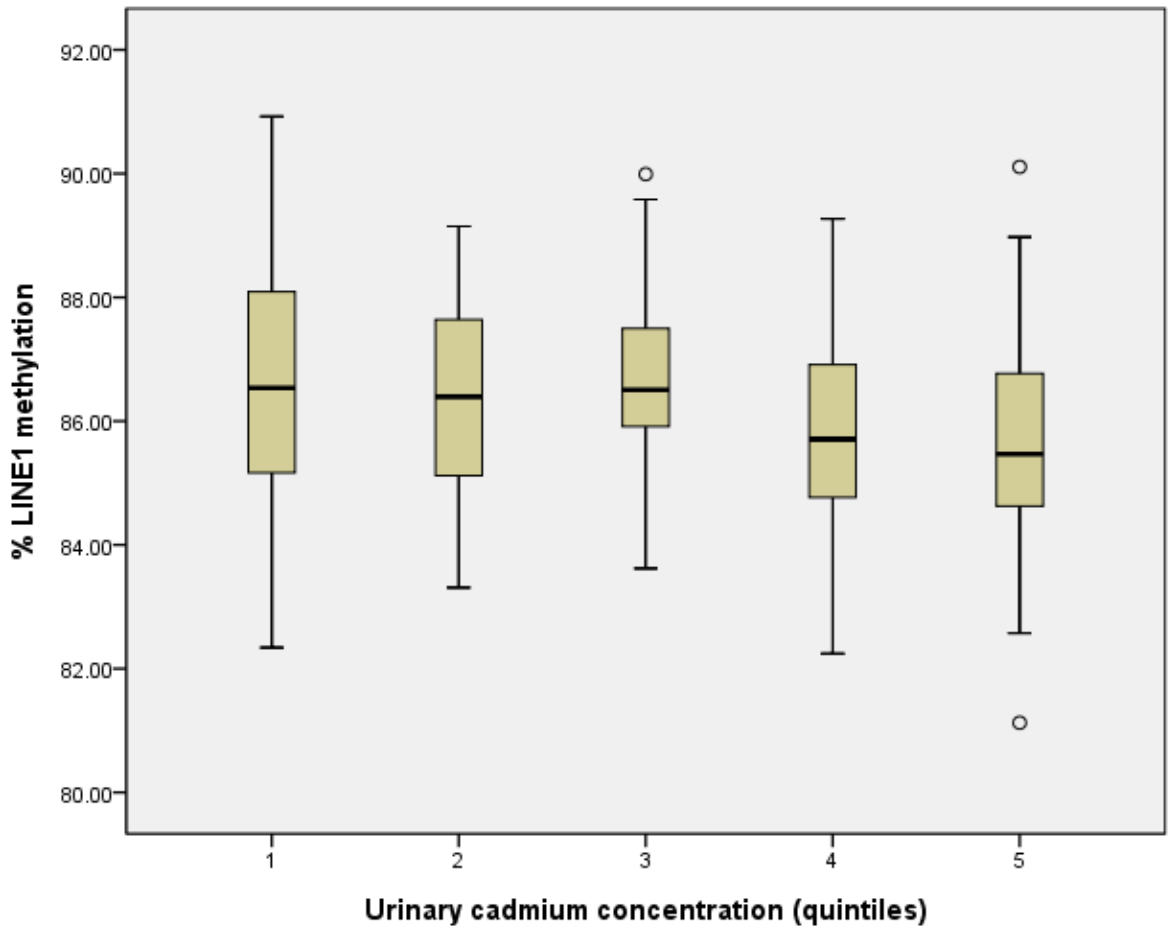

Supplemental Material, Figure 1. **Mean fraction of methylated *LINE1* in peripheral lymphocytes according to quintiles of cadmium concentration in urine.** Boxes extend from the 25th to the 75th percentile, horizontal bars represent the median, whiskers represent the range of the values, and outliers (values more than 1.5 box-lengths away from the box) are represented as points. Urinary cadmium concentration quintile 1: 0.013 to  $\leq 0.129$ , quintile 2:  $>0.129$  to  $\leq 0.185$ , quintile 3:  $>0.185$  to  $\leq 0.265$ , quintile 4:  $>0.265$  to  $\leq 0.373$ , and quintile 5:  $>0.373$  to  $\leq 1.52$   $\mu\text{g/L}$ .

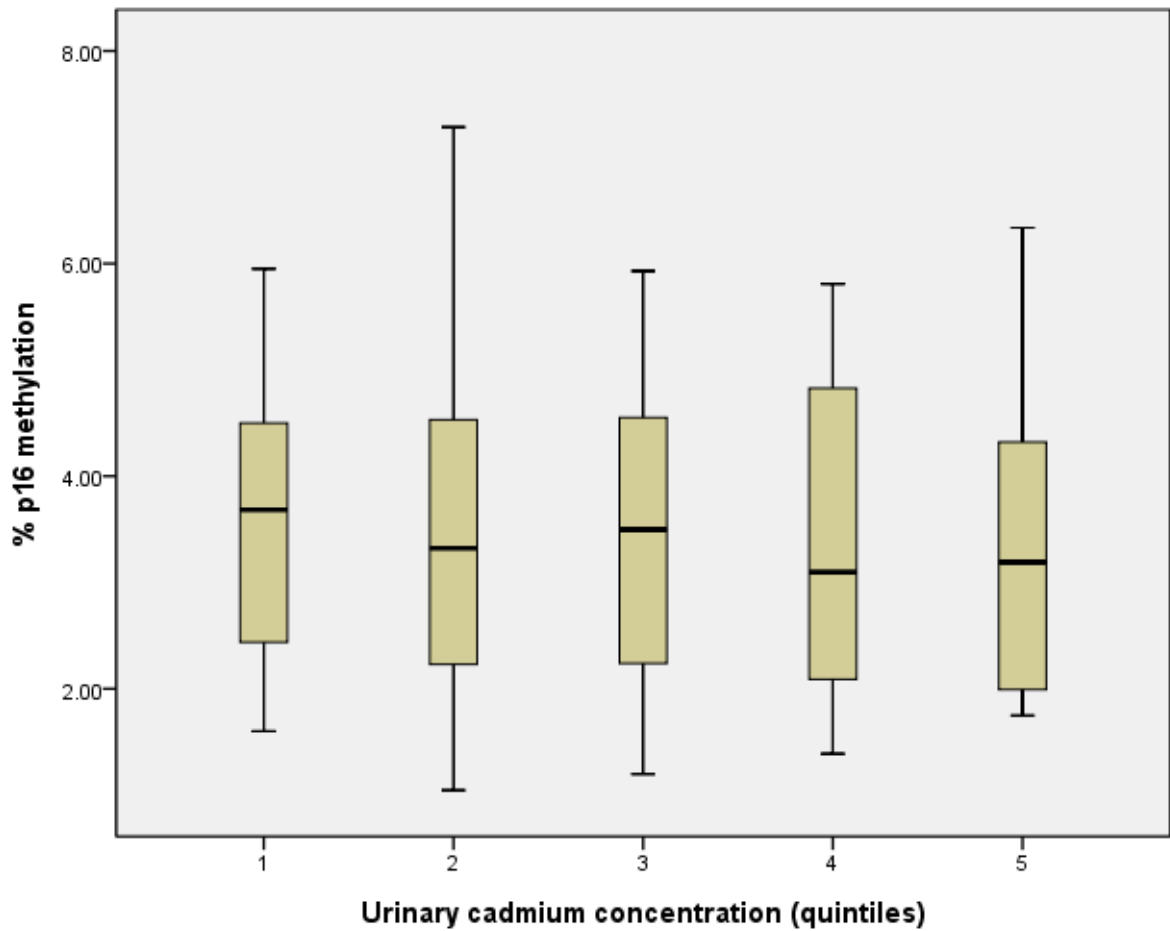

Supplemental Material, Figure 2. **Mean fraction of methylated *p16* in peripheral lymphocytes according to quintiles of cadmium concentration in urine.** Boxes extend from the 25th to the 75th percentile, horizontal bars represent the median, and whiskers represent the range of the values. Urinary cadmium concentration quintile 1: 0.013 to  $\leq 0.129$ , quintile 2:  $>0.129$  to  $\leq 0.185$ , quintile 3:  $>0.185$  to  $\leq 0.265$ , quintile 4:  $>0.265$  to  $\leq 0.373$ , and quintile 5:  $>0.373$  to  $\leq 1.52$   $\mu\text{g/L}$ .

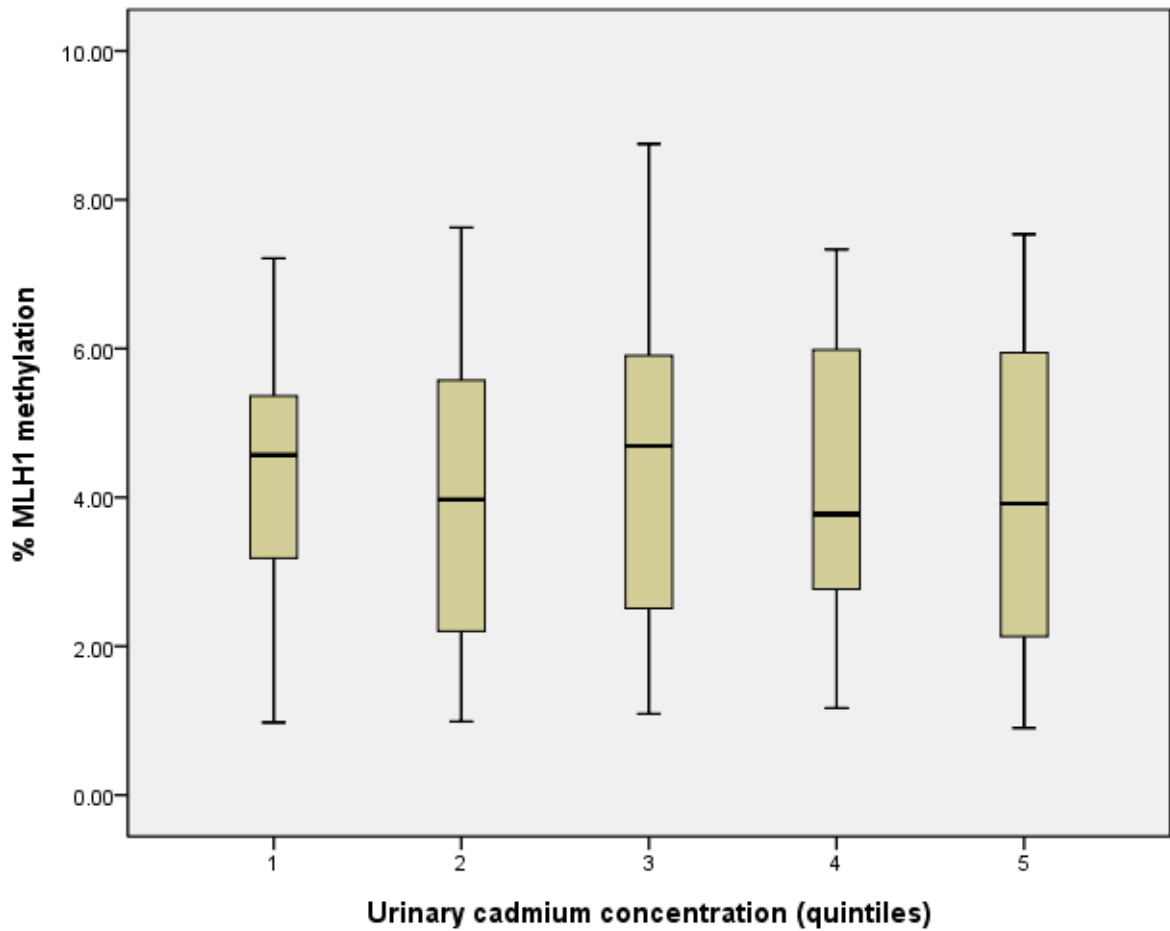

Supplemental Material, Figure 3. **Mean fraction of methylated *MLH1* in peripheral lymphocytes according to quintiles of cadmium concentration in urine.** Boxes extend from the 25th to the 75th percentile, horizontal bars represent the median, and whiskers represent the range of the values. Urinary cadmium concentration quintile 1: 0.013 to  $\leq 0.129$ , quintile 2:  $>0.129$  to  $\leq 0.185$ , quintile 3:  $>0.185$  to  $\leq 0.265$ , quintile 4:  $>0.265$  to  $\leq 0.373$ , and quintile 5:  $>0.373$  to  $\leq 1.52$   $\mu\text{g/L}$ .
